# Supplementary material for: Removal of Pb-based compounds mediated by graphene oxide-like materials obtained from Sargassum: unravelling key features of their interaction using density functional theory and spectroscopic methods
Source: Royal Society of Chemistry journal article supplement (doi:10.1039/d4en00301b), 2024-01-01
Supplement: d4en00301b2.pdf [file d4en00301b2.pdf]

## Supplementary Information

### **Removal of Pb-based compounds mediated by graphene oxide-like materials obtained from Sargassum: Unravelling key features of their interaction using density functional theory and spectroscopic methods.**

*Sandra Julieta Gutiérrez-Ojeda<sup>a</sup>, Rocío Martínez-Flores<sup>b\*</sup>, Raúl Pareja-Rodríguez<sup>c</sup>, Geonel Rodríguez-Gattorno<sup>c</sup>, Rodrigo Ponce-Pérez<sup>d\*</sup>, María Guadalupe Moreno-Armenta<sup>d</sup>, Jonathan Guerrero-Sánchez<sup>d</sup>*

<sup>a</sup> *Instituto de Física, Universidad Nacional Autónoma de México, 04510 Ciudad de México, México.*

<sup>b</sup> *Tecnológico Nacional de México, TecNM, Instituto Tecnológico Superior de Monclova, Carretera 57 km. 4.5, 25733 Monclova, Coahuila, México.*

<sup>c</sup> *Departamento de Física Aplicada, CINVESTAV-IPN, Carr. Antigua a Progreso km. 6, CORDEMEX, 97310 Mérida, Yucatán, México.*

<sup>d</sup> *Centro de Nanociencias y Nanotecnología, Universidad Nacional Autónoma de México, Km. 107, Apdo. 14 Carretera Tijuana - Ensenada, Baja California, México.*

*\*Authors to whom correspondence should be addressed: [rocio.mf@monclova.tecnm.mx](mailto:rocio.mf@monclova.tecnm.mx) (R.M.F.) and [rponce@ens.cryn.unam.mx](mailto:rponce@ens.cryn.unam.mx) (R.P.P.)*

The optimization curves for the cutoff energy, k-points and graphene cell parameter are depicted in **Figure S1**. Notice that at 480 eV of energy cutoff, a linear tendency is observed denoting that this energy is good enough to describe the system. The k-points graph shows that for a grid of  $7 \times 7 \times 1$ , the energy is converged.

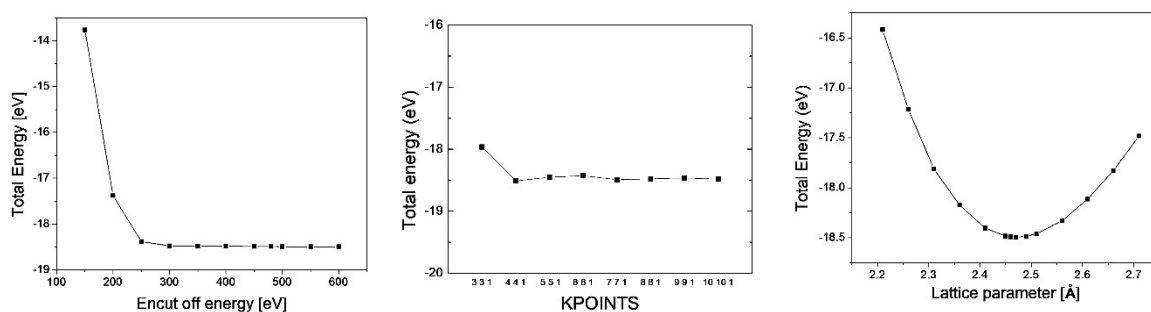

**Figure S1.** From left to right are the optimization curves for energy cutoff, k-points, and cell parameters.

In the hydrocerussite mineral, the  $\text{PbCO}_3$  is a laminar compound composed of  $\text{Pb}^{2+}$  ions three-fold coordinated with  $\text{CO}_3^{2-}$  functional groups by six ionic bonds of 2.62 Å in length. To perform a realistic interaction between GOs and cerussite, we isolated the  $\text{Pb}(\text{CO}_3)_3$  molecule to maintain the chemical environment of Pb in the mineral.

**Figure S2** shows the electron localization function (ELF) isosurfaces for the  $\text{PbCO}_3$  crystal and the  $\text{Pb}(\text{CO}_3)_3$  molecule, which are equivalent. Also, **Figure S2c** depicts the line profiles for the Pb-O bonds in the crystal and the molecule. Notice a similar ELF distribution in both, crystal and molecule; the line profiles also show similar bond lengths and ionic behavior.

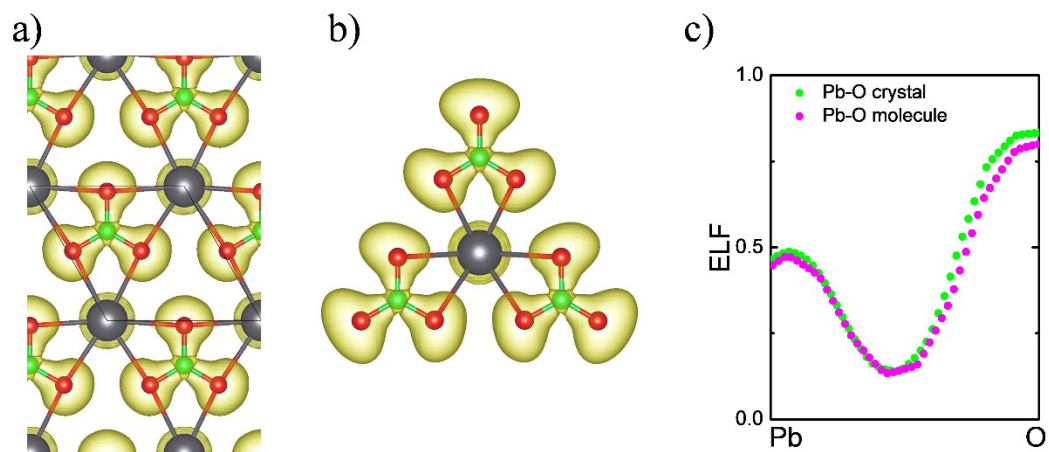

**Figure S2.** ELF isosurfaces (with isovalue of 0.5) for a) the crystal  $\text{PbCO}_3$  and b) the  $\text{Pb}(\text{CO}_3)_3$  molecule, and c) depicts the line profile along the Pb-O bond present in both systems.

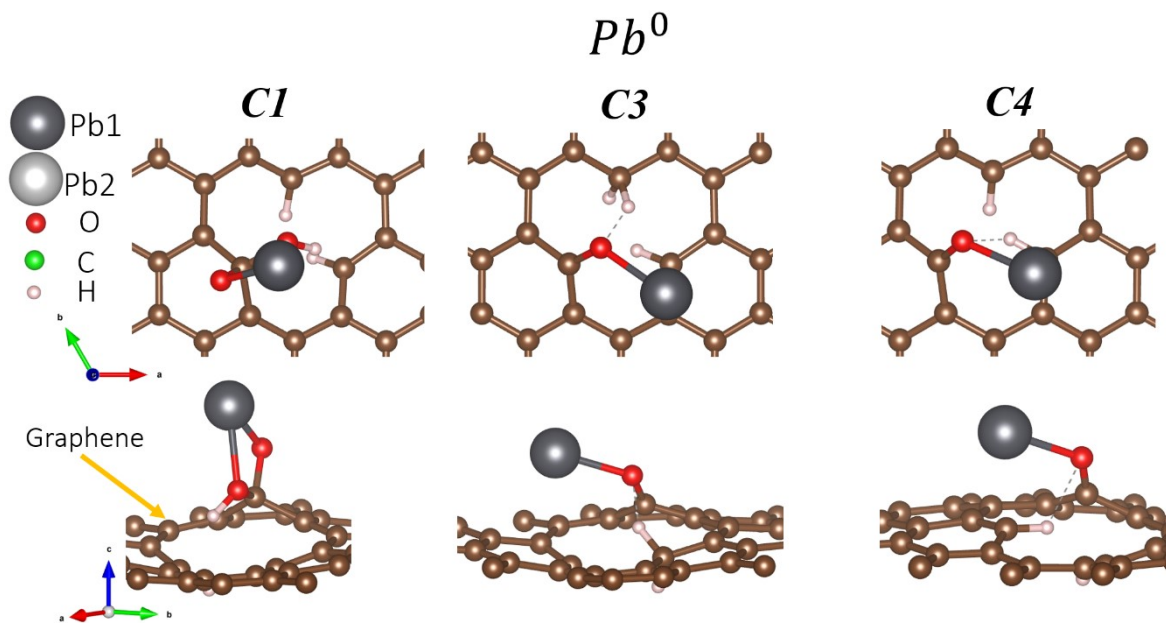

**Figure S3.** Top and side views of several models for the  $\text{Pb}^{2+}$  adsorption.

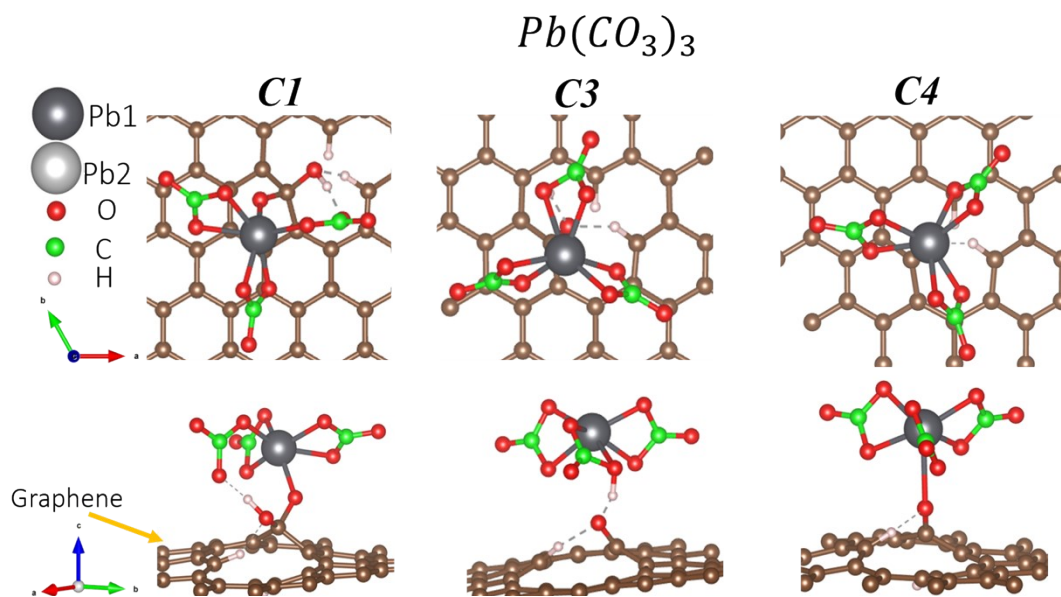

**Figure S4.** Top and side views of several models for  $Pb(CO_3)_3$  molecule adsorption onto GOs.

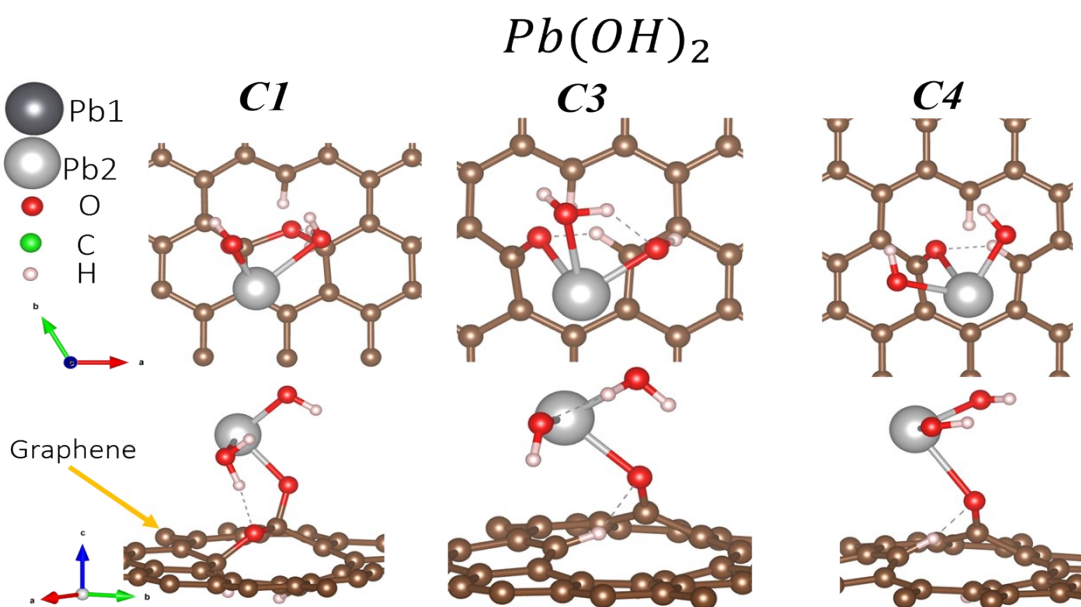

**Figure S5.** Top and side views of the less stable  $Pb(OH)_2$  adsorption models.

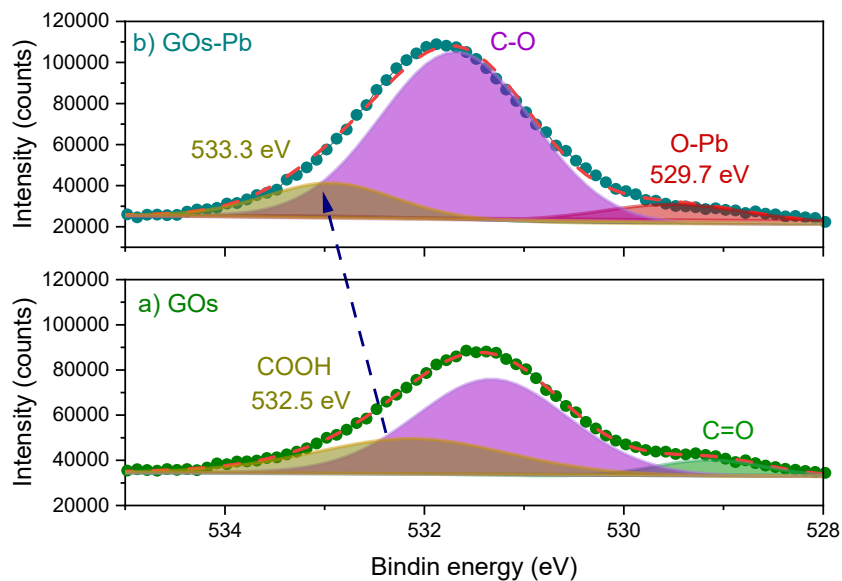

**Figure S6.** Deconvolution of O<sub>1s</sub> peak for GOs a) after the interaction with Pb<sup>2+</sup> and b) before the interaction.

The EDS map likely shows a spatial distribution of elements, and in this case, it reveals the presence of metallic lead (Pb) on the surface of the GOs-Pb material. The map would display regions where the Pb signal is detected, indicating the localization of metallic lead within the material.

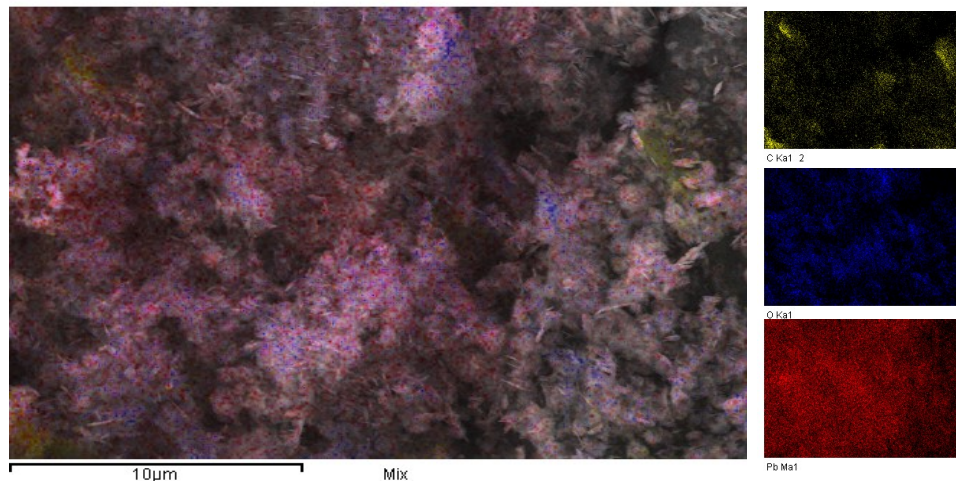

**Figure S7.** EDS mapping of GOs-Pb<sup>2+</sup> material

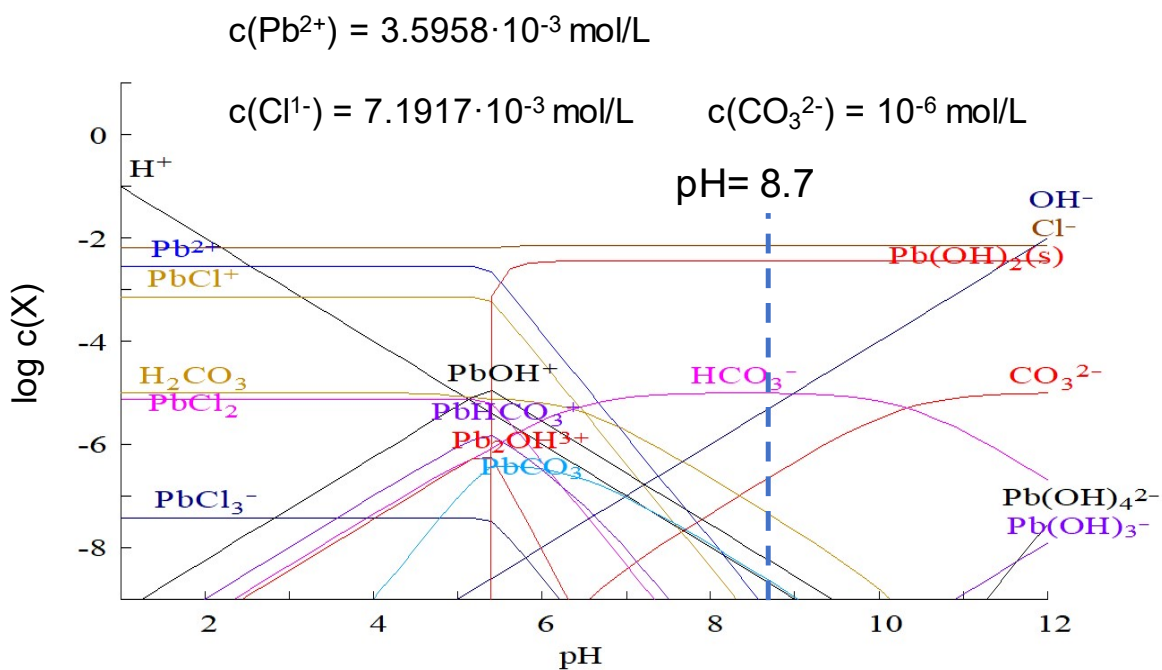

**Figure S8.** Logarithmic distribution diagram of the species presents during the GOS-Pb<sup>2+</sup> interaction.

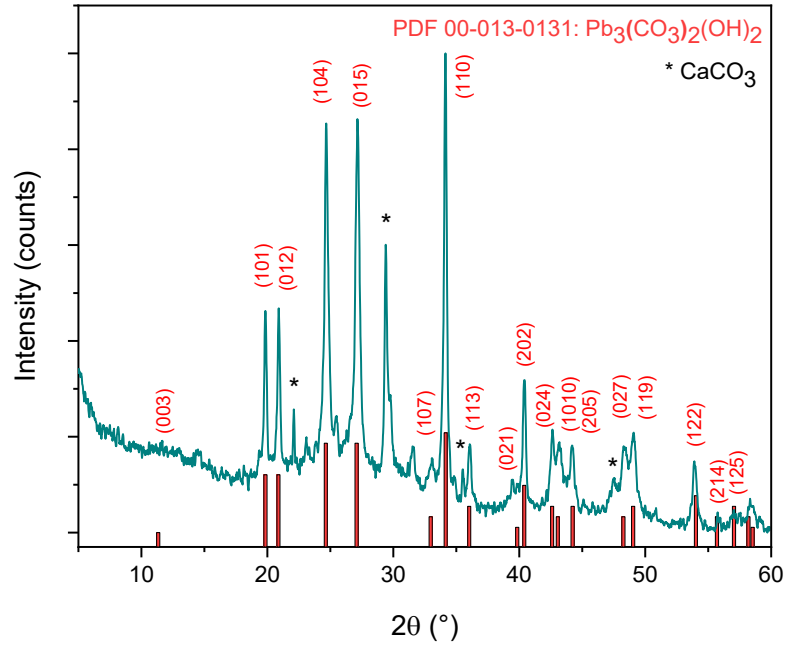

**Figure S9.** XRD of GOs-Pb<sup>2+</sup> system.

## Guide of terms

Electron density gradient  $\nabla\rho(r)$

$$\rho\nabla(r) = \begin{bmatrix} \frac{\partial\rho(r)}{\partial x} \\ \frac{\partial\rho(r)}{\partial y} \\ \frac{\partial\rho(r)}{\partial z} \end{bmatrix}$$

Electron density Gradient Norm  $|\nabla\rho(r)|$

$$|\nabla\rho(r)| = \sqrt{\nabla\rho(r) \cdot \nabla\rho(r)} = \sqrt{\left(\frac{\partial\rho(r)}{\partial x}\right)^2 + \left(\frac{\partial\rho(r)}{\partial y}\right)^2 + \left(\frac{\partial\rho(r)}{\partial z}\right)^2}$$

Reduced density gradient  $s(\rho)$

$$s(\rho) = \frac{1}{2} \frac{|\nabla\rho|}{(3\pi^2)^{1/3} \rho^{4/3}}$$

Electron density Hessian  $\nabla\nabla^T\rho(r)$

$$\nabla\nabla^T\rho(r) = \begin{bmatrix} \frac{\partial^2\rho(r)}{\partial x^2} & \frac{\partial^2\rho(r)}{\partial x\partial y} & \frac{\partial^2\rho(r)}{\partial x\partial z} \\ \frac{\partial^2\rho(r)}{\partial y\partial x} & \frac{\partial^2\rho(r)}{\partial y^2} & \frac{\partial^2\rho(r)}{\partial y\partial z} \\ \frac{\partial^2\rho(r)}{\partial z\partial x} & \frac{\partial^2\rho(r)}{\partial z\partial y} & \frac{\partial^2\rho(r)}{\partial z^2} \end{bmatrix}$$

Electron density Laplacian  $\nabla^2\rho(r)$

$$\nabla^2\rho(r) = \nabla \cdot \nabla\rho(r) = \frac{\partial^2\rho(r)}{\partial x^2} + \frac{\partial^2\rho(r)}{\partial y^2} + \frac{\partial^2\rho(r)}{\partial z^2} = \lambda_1 + \lambda_2 + \lambda_3$$
